# Supplementary material for: Causal Effects of Prenatal Exposure to PM2.5 on Child Development and the Role of Unobserved Confounding
Source: Int J Environ Res Public Health. 2019 Nov 9;16(22):4381. doi: 10.3390/ijerph16224381 (PMC6888495; doi:10.3390/ijerph16224381)
Supplement: Supplementary file 1 [file ijerph-16-04381-s001.pdf]

Table S1. Range of the estimated propensity score among treated and controls, by imputation.

|                   | Number of subjects |         | Min, max propensity score |                |
|-------------------|--------------------|---------|---------------------------|----------------|
|                   | Controls           | Treated | Controls                  | Treated        |
| First imputation  | 178                | 213     | (0.008, 0.971)            | (0.042, 0.984) |
| Second imputation | 193                | 198     | (0.004, 0.980)            | (0.030, 0.992) |
| Third imputation  | 190                | 201     | (0.009, 0.969)            | (0.033, 0.988) |
| Fourth imputation | 183                | 208     | (0.001, 0.958)            | (0.014, 0.987) |
| Fifth imputation  | 189                | 202     | (0.005, 0.978)            | (0.038, 0.989) |

Table S2. Between imputation variance, within imputation variance and their ratio, calculated for the average causal effect of treatment on the treated (ATT) for mental and psychomotor scores.

| Mental score       |                   |         | Psychomotor score  |                   |         |
|--------------------|-------------------|---------|--------------------|-------------------|---------|
| Variance           |                   |         | Variance           |                   |         |
| Between imputation | Within imputation | B/W (%) | Between imputation | Within imputation | B/W (%) |
| 0.43               | 8.04              | 5.4     | 0.83               | 9.12              | 9.1     |

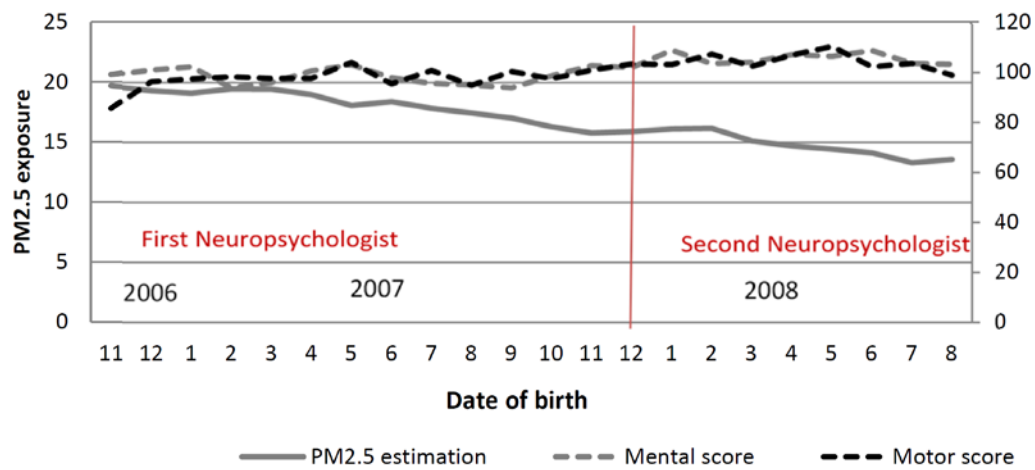

Figure S1. Time series of monthly average PM<sub>2.5</sub> exposures and monthly average mental and psychomotor scores. The red line indicates the time when the second neuropsychologist substituted the first one.

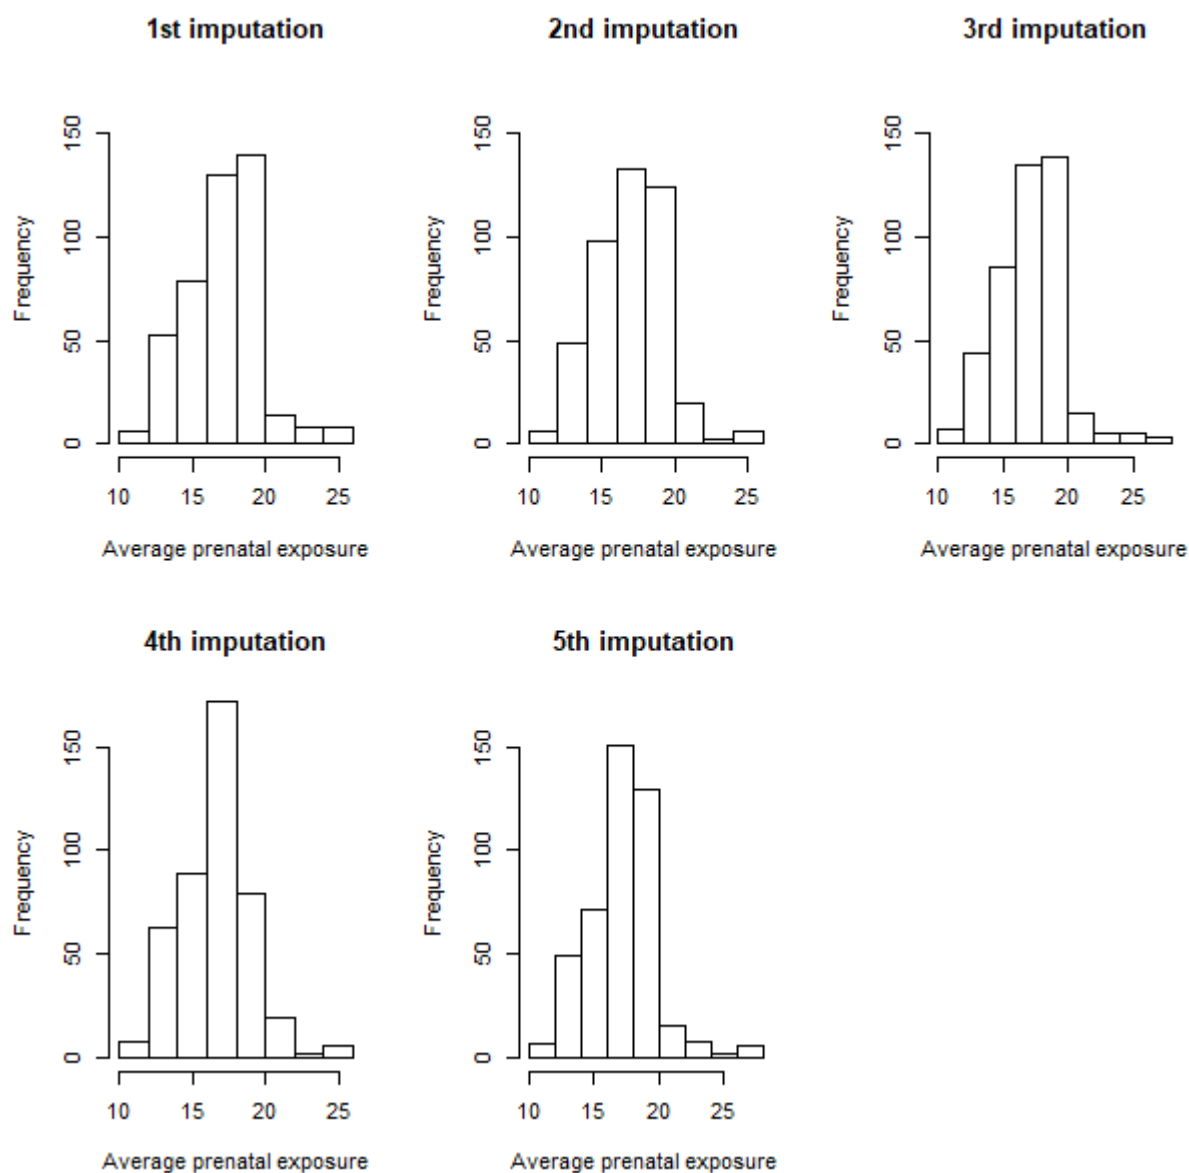

Figure S2. Distribution of the average prenatal exposure to PM<sub>2.5</sub>, by imputed data set.
